# Supplementary material for: Rapid synthesis of CdS nanowire meshviaa simplistic wet chemical route and its NO2gas sensing properties
Source: Royal Society of Chemistry journal article supplement (doi:10.1039/c7nj04593j), 2018-01-01

# Rapid synthesis of CdS nanowire mesh via simplistic wet chemical route and their NO<sub>2</sub> gas sensing properties

Sharadrao A. Vanalakar<sup>1,2\*</sup>, Vithoba L. Patil<sup>2</sup>, Pramod S. Patil<sup>3</sup>, Jin H. Kim<sup>1\*</sup>

<sup>1</sup>Department of Materials Science and Engineering, Chonnam National University, Gwangju 500-757, South Korea

<sup>2</sup>Department of Physics, Karmaveer Hire Arts, Science, Commerce and Education College, Gargoti 416-009, India

<sup>3</sup>Department of Physics, Shivaji University, Kolhapur 416-009, India

## Supplementary Information

**Fig. (S1):** I-V characteristics of Ag-CdS (sample CdS:20)

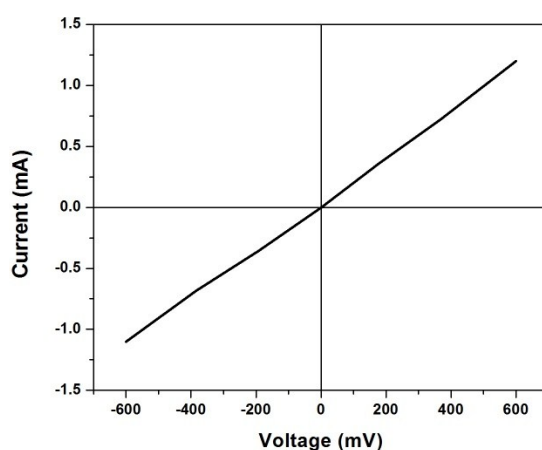

**Fig. (S2):** XPS spectra of all CdS thin film samples (a) Cd spectrum and (b) S spectrum

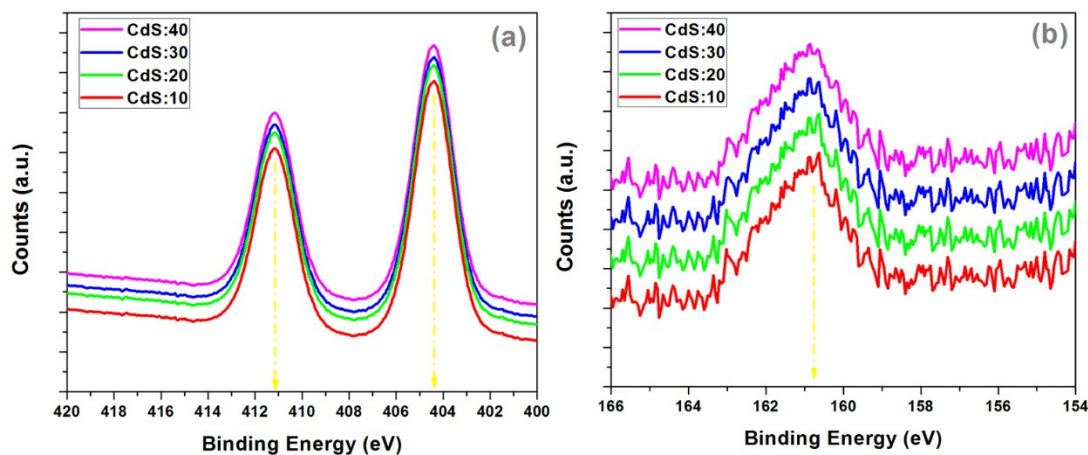

**Fig. (S3):** The room temperature optical absorption spectrum of all CdS thin films. Inset shows the optical band gap energy spectra.

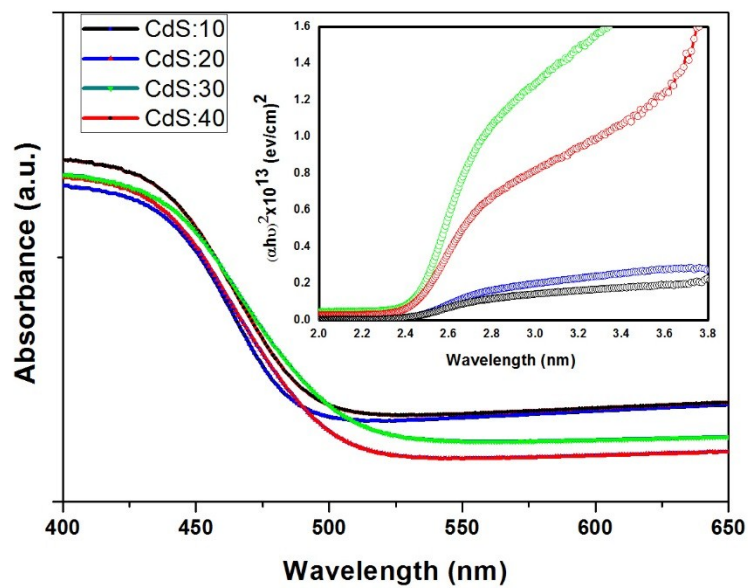

**Fig. (S4):** The steady state region of resistance versus time graphs for sample CdS:20 at 200 °C in (a) 20 ppm, (b) 40 ppm, (c) 60 ppm, (d) 80 ppm.

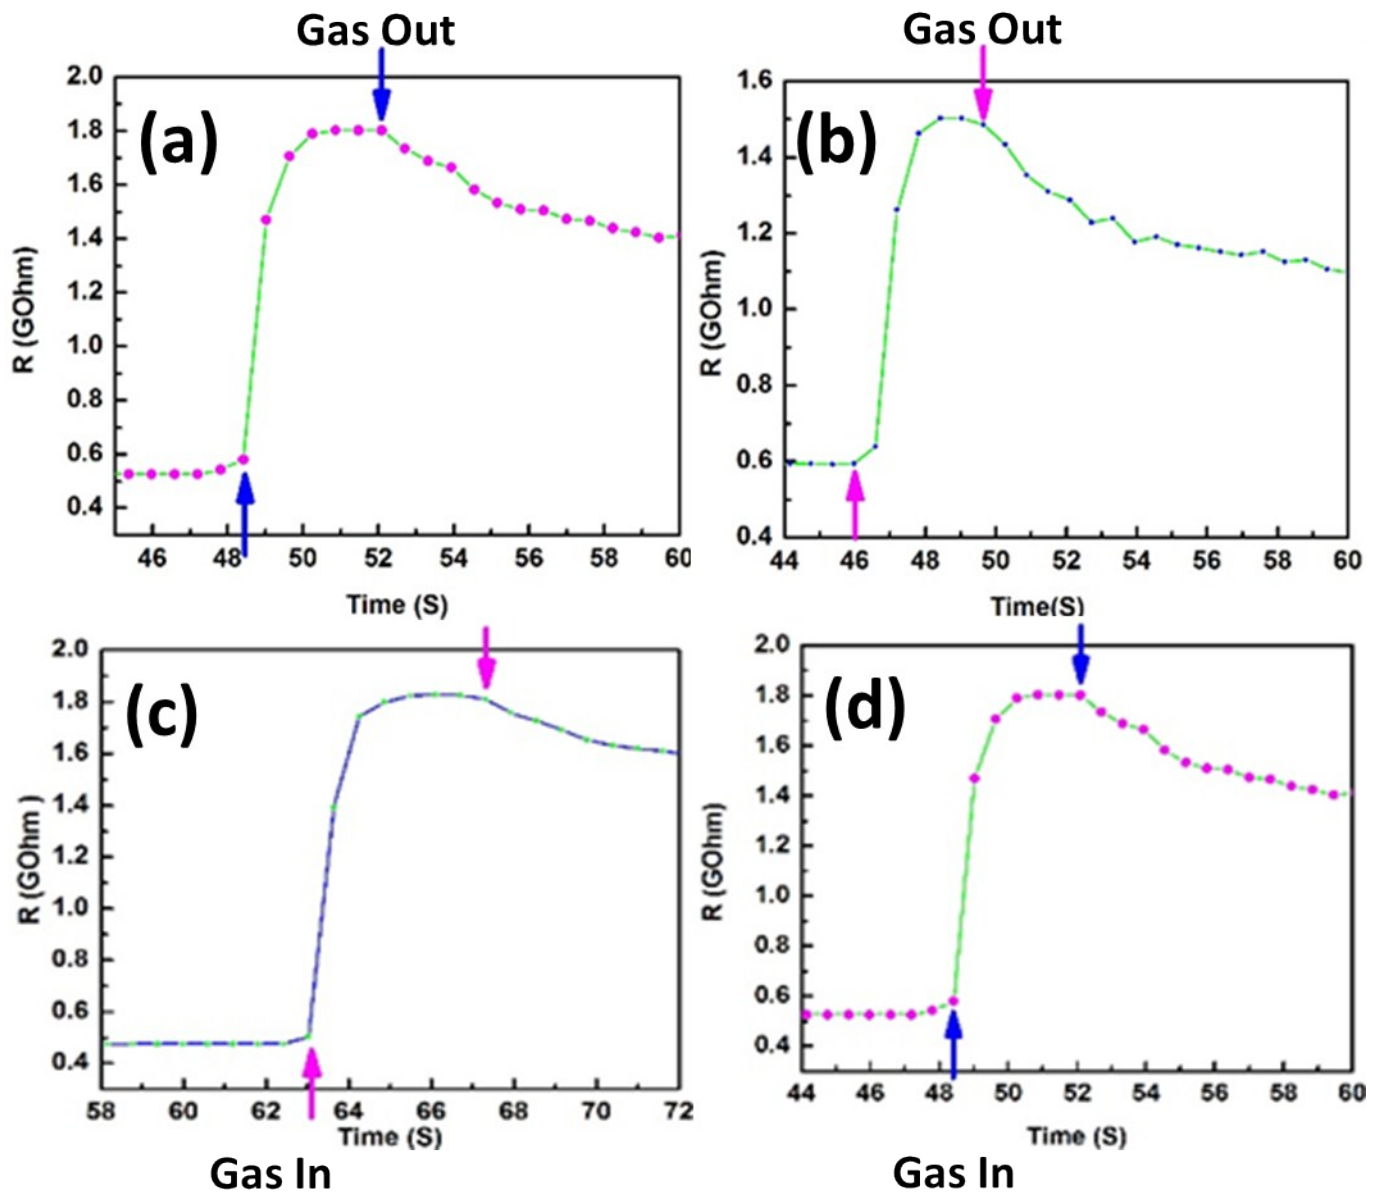

**Fig. (S5):** Variation of  $\log(\rho)$  as a function of inverse of temperature of all CdS thin film samples annealed at 150 °C. Following figure shows that, the electrical resistivity decreases with increase in temperature.

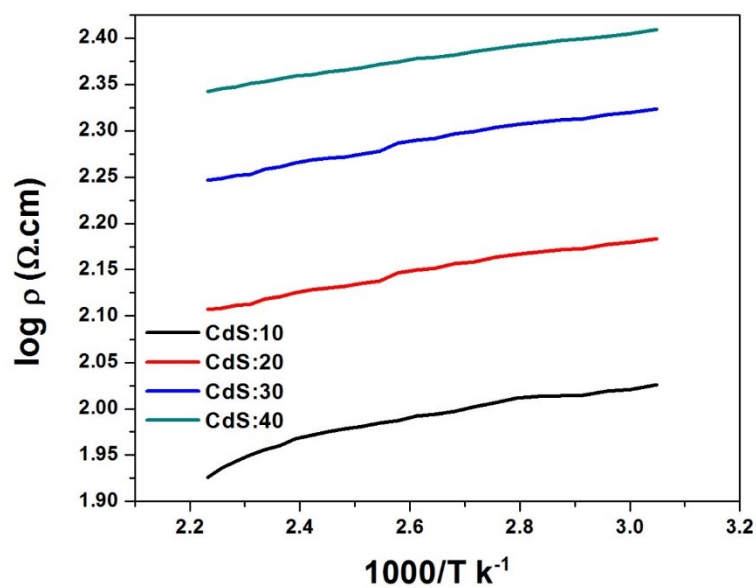

**Fig. (S6)** The SEM images of annealed CdS thin films samples (a1 and 2) CdS:10, (b1 and 2) CdS:20 and (c1 and 2) CdS:30. The CdS thin films were annealed at 150 °C.

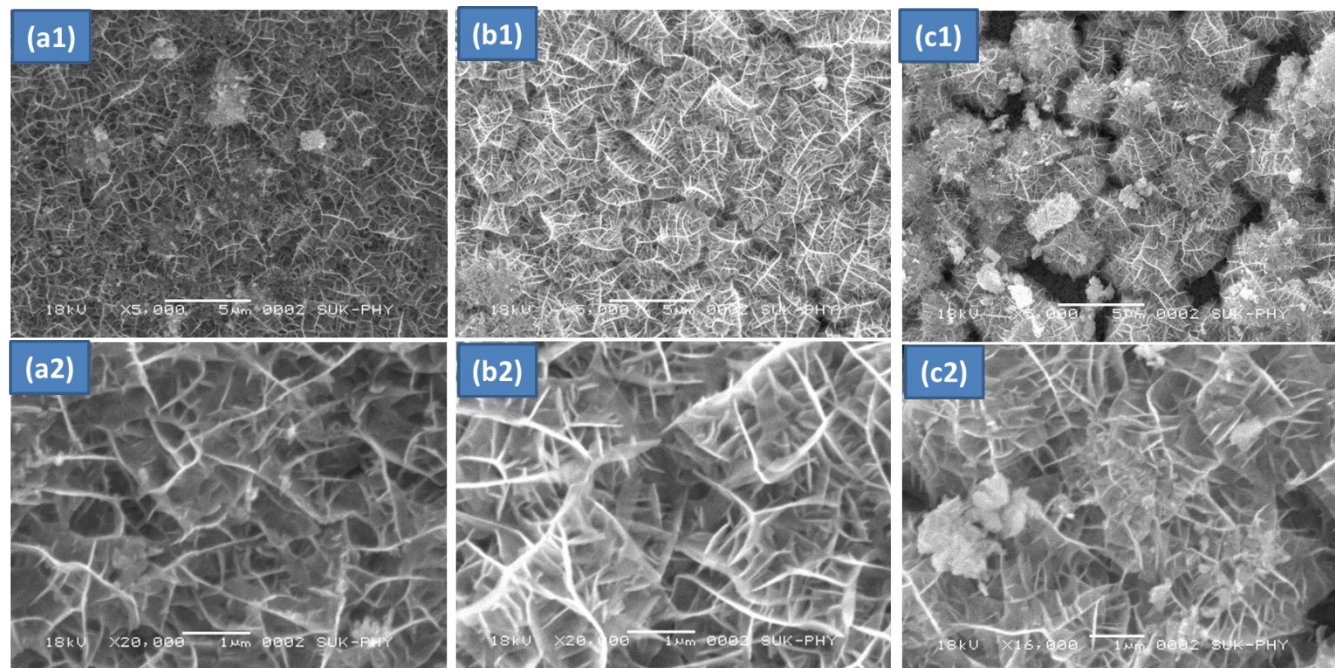

**Fig. (S7):** The resistance versus time graphs for sample CdS:20 at 200 °C in (a) NH<sub>3</sub>, (b) SO<sub>2</sub>, (c) acetone, (d) LPG

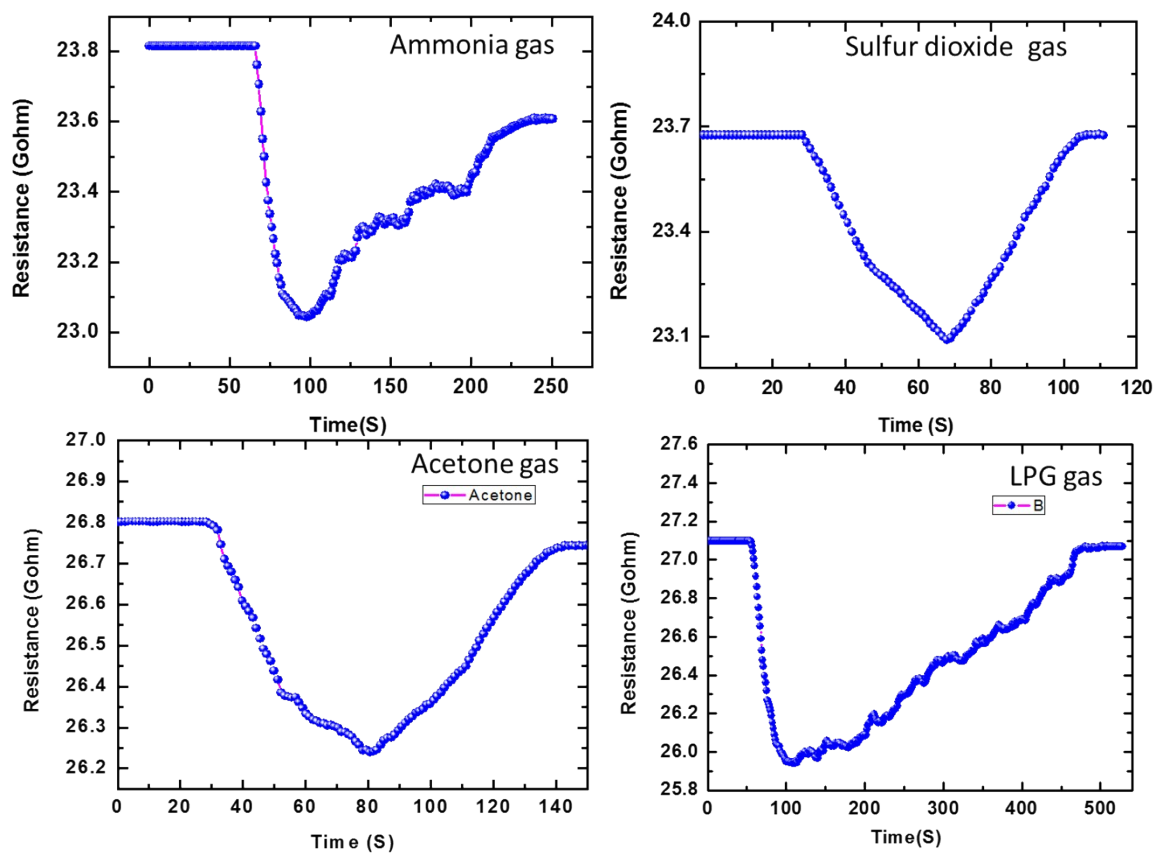

Supplement: c7nj04593j1.pdf [file c7nj04593j1.pdf]
